# Supplementary material
Source: MDPI journal article supplement (https://www.mdpi.com/2073-4352/7/10/319)
Supplement: s1 [file s1]

Supplementary Information

## Formation Mechanism of $\text{CaCO}_3$ Spherulites in Myostracum Layer of Limpet Shells

Shitao Wu, Chang-Yang Chiang and Wuzong Zhou\*

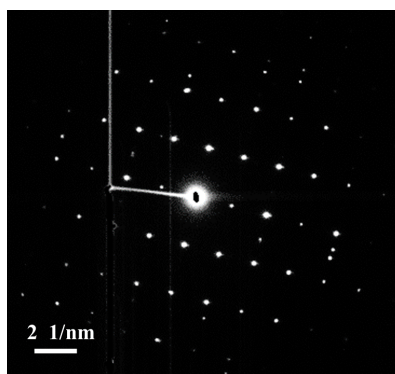

Figure S1. SAED pattern recorded from a large area in a mesorod, covering polycrystalline area containing self-orientated nanocrystallites and single crystalline region. The corresponding HRTEM images are shown in Figure 4(b,c) in the paper.
